# Supplementary material for: ExSTED microscopy reveals contrasting functions of dopamine and somatostatin CSF-c neurons along the lamprey central canal
Source: eLife. 2022 Feb 1;11:e73114. doi: 10.7554/eLife.73114 (PMC8809891; doi:10.7554/eLife.73114)
Supplement: Figure 1—source data 1. — Quantification of the somatostatin and dopaminergic CSF-c neurons in four areas (areas 1–4) of spinal cord. [file elife-73114-fig1-data1.xlsx]

## Sheet: Figure1F
	somatostatin cells	Dopaminergic cells	Total cells	volum um3 of scanning						Quantification of the somatostatin and dopamin CSF-c neurons
Area1	37.5	17	54.5	360						along spinal cord
Area 2	53	20	73	360						Area1, Area 2, Area 3, Area4
Area 3	30	19	49	360
Area 4	31	13	44	360
			220.5
somatostatin
	Area 1	Area 2	Area3	Area 4
Sample 1	45	67	34	30
Sample 2	30	40	20	32
Sample 3	35	55	30	27
sample 4	40	50	36	35
MEAN	37.5	53	30	31
SD	5.59017	9.72111	6.16441	2.91548
Dopamine
	Area 1	Area 2	Area3	Area 4
Sample 1	20	23	16	11
Sample 2	15	16	20	15
Sample 3	19	20	23	12
Sample 4	14	21	17	14
MEAN	17	20	19	13
SD	2.54951	2.54951	2.73861	1.58114
somatostatin					Dopamine
	Area 1	Area 2	Area3	Area 4	Area 1	Area 2	Area3	Area 4
	45	67	34	30	20	23	16	11
	30	40	20	32	15	16	20	15
	35	55	30	27	19	20	23	12
	40	50	36	35	14	21	17	14
ttest	somatostatin		ttest	som-dopamine
two-tail	P value			P value
A 1-2	0.0168104		A 1-1	0.00582721
A 2-3	0.010602		A 2-2	0.00459986
A 3-4	0.805463		A 3-3	0.0950188
A 2-4	0.0428392		A 4-4	0.000798807
somatostatin CSF-c neuons
	t-Test: Paired Two Sample for Means					t-Test: Paired Two Sample for Means				t-Test: Paired Two Sample for Means				t-Test: Paired Two Sample for Means
	A1-2					A2-3				A3-4				A2-4
		Area 1	Area 2				Area 2	Area3			Area3	Area 4			Area 2	Area 4
	Mean	37.5	53			Mean	53	30		Mean	30	32		Mean	53	31
	Variance	41.6667	126			Variance	126	50.6667		Variance	50.6667	18		Variance	126	11.3333
	Observations	4	4			Observations	4	4		Observations	4	4		Observations	4	4
	Pearson Correlation	0.874083				Pearson Correlation	0.700877			Pearson Correlation	-0.331133			Pearson Correlation	-0.414584
	Hypothesized Mean Difference	0				Hypothesized Mean Difference	0			Hypothesized Mean Difference	0			Hypothesized Mean Difference	0
	df	3				df	3			df	3			df	3
	t Stat	-4.84139				t Stat	5.72028			t Stat	-0.424795			t Stat	3.38796
	P(T<=t) one-tail	0.0084052				P(T<=t) one-tail	0.005301			P(T<=t) one-tail	0.349806			P(T<=t) one-tail	0.0214196
	t Critical one-tail	2.35336				t Critical one-tail	2.35336			t Critical one-tail	2.35336			t Critical one-tail	2.35336
	P(T<=t) two-tail	0.0168104				P(T<=t) two-tail	0.010602			P(T<=t) two-tail	0.699612			P(T<=t) two-tail	0.0428392
	t Critical two-tail	3.18245				t Critical two-tail	3.18245			t Critical two-tail	3.18245			t Critical two-tail	3.18245
Somatostatin						t-Test: Paired Two Sample for Means				t-Test: Paired Two Sample for Means				t-Test: Paired Two Sample for Means
Dopamine	t-Test: Paired Two Sample for Means					A2-2				A3-3
							Area 2	Area 2			Area3	Area3			Area 4	Area 4
		Area 1	Area 1			Mean	53	20		Mean	30	19		Mean	31	13
	Mean	37.5	17			Variance	126	8.66667		Variance	50.6667	10		Variance	11.3333	3.33333
	Variance	41.6667	8.66667			Observations	4	4		Observations	4	4		Observations	4	4
	Observations	4	4			Pearson Correlation	0.917928			Pearson Correlation	-0.503497			Pearson Correlation	0.650791
	Pearson Correlation	0.438529				Hypothesized Mean Difference	0			Hypothesized Mean Difference	0			Hypothesized Mean Difference	0
	Hypothesized Mean Difference	0				df	3			df	3			df	3
	df	3				t Stat	7.67234			t Stat	2.40998			t Stat	13.9427
	t Stat	7.06617				P(T<=t) one-tail	0.00229993			P(T<=t) one-tail	0.0475094			P(T<=t) one-tail	0.000399403
	P(T<=t) one-tail	0.0029136				t Critical one-tail	2.35336			t Critical one-tail	2.35336			t Critical one-tail	2.35336
	t Critical one-tail	2.35336				P(T<=t) two-tail	0.00459986			P(T<=t) two-tail	0.0950188			P(T<=t) two-tail	0.000798807
	P(T<=t) two-tail	0.00582721				t Critical two-tail	3.18245			t Critical two-tail	3.18245			t Critical two-tail	3.18245
	t Critical two-tail	3.18245
