# Supplementary material for: ExSTED microscopy reveals contrasting functions of dopamine and somatostatin CSF-c neurons along the lamprey central canal
Source: eLife. 2022 Feb 1;11:e73114. doi: 10.7554/eLife.73114 (PMC8809891; doi:10.7554/eLife.73114)
Supplement: Figure 2—source data 1. — Analysis of somatostatin DCVs diameter measured with confocal and stimulated emission depletion (STED) microscopy. [file elife-73114-fig2-data1.xlsx]

## Sheet: Figure 2D
Diameter	Confocal	STED					Analysis of somatostatin DCVs diameter measured with confocal and STED microscopy
micrometer	0.2463	0.1477
	0.3078	0.1511
	0.2854	0.1062						Somatostatin vesicles size Diameter
	0.3788	0.1332						unit= micro meter
	0.3094	0.1392
	0.315	0.1355
	0.2644	0.1179
	0.4807	0.1253
	0.301	0.1489
	0.4993	0.0964
	0.3795	0.0767
	0.4977	0.1267
	0.5097	0.1039
	0.3015	0.1373
	0.387	0.09632
	0.2961	0.1317
	0.3242	0.07728
	0.3307	0.07414
	0.5262	0.08028
	0.2331	0.1092
	0.2597	0.06782
	0.227	0.1328
	0.2191	0.1352
	0.2864	0.1441
	0.3508	0.1113
	0.3196	0.1275
	0.3283	0.103
	0.2759	0.08572
	0.2538	0.1019
	0.3253	0.1188
	0.265	0.1021
	0.2647	0.107
	0.5282	0.1203
	0.2523	0.135
	0.2087	0.1068
	0.2501	0.1063
	0.2808	0.09277
	0.2993	0.1014
	0.4256	0.1635
	0.2506	0.107
	0.299	0.118
	0.2652	0.09781
	0.6512	0.1342
	0.1808	0.1155
	0.242	0.08762
	0.2506	0.1173
