# Supplementary material for: ExSTED microscopy reveals contrasting functions of dopamine and somatostatin CSF-c neurons along the lamprey central canal
Source: eLife. 2022 Feb 1;11:e73114. doi: 10.7554/eLife.73114 (PMC8809891; doi:10.7554/eLife.73114)
Supplement: Figure 2—source data 2. — Analysis of dopamine DCVs diameter measured with confocal and stimulated emission depletion (STED) microscopy. [file elife-73114-fig2-data2.xlsx]

## Sheet: Figure 2H
								Analysis of Dopamine DCVs diameter measured with confocal and STED microscopy
Diameter	confocal	STED
	0.3463	0.127
	0.3078	0.104							Dopamine vesicles Diameter
	0.2554	0.087							unit= micro meter
	0.3788	0.074
	0.3094	0.11
	0.315	0.092
	0.2944	0.123
	0.3807	0.113
	0.301	0.113
	0.4093	0.14
	0.3795	0.162
	0.4377	0.099
	0.5397	0.117
	0.3015	0.069
	0.387	0.097
	0.2761	0.129
	0.3242	0.203
	0.3307	0.118
	0.5062	0.101
	0.2331	0.107
	0.2597	0.117
	0.257	0.151
	0.2491	0.098
	0.2864	0.085
	0.3508	0.105
	0.3196	0.113
	0.3283	0.112
	0.2759	0.127
	0.2938	0.107
	0.3253	0.112
	0.265	0.102
	0.2647	0.118
	0.5282	0.113
	0.2723	0.114
	0.2087	0.106
	0.2201	0.097
	0.2808	0.112
	0.2993	0.109
	0.4056	0.098
	0.2506	0.092
	0.299	0.114
	0.2652	0.162
	0.5512	0.122
	0.1708	0.091
