# Supplementary material for: ExSTED microscopy reveals contrasting functions of dopamine and somatostatin CSF-c neurons along the lamprey central canal
Source: eLife. 2022 Feb 1;11:e73114. doi: 10.7554/eLife.73114 (PMC8809891; doi:10.7554/eLife.73114)
Supplement: Figure 3—figure supplement 1—source data 1. — Quantification of somatostatin DCVs number density in cell volume (µm–3) of somatostatin-expressing CSF-c neurons in the different pH. [file elife-73114-fig3-figsupp1-data1.xlsx]

## Sheet: Figure 3-figure supplement 1D
Cells	Vesicles ALL	Vesicles (<0.08um3)	Cell Volume(um3)	Density	zstack	pH	Cells	pH	Quantification of the somatostatin DCVs number density in cell volume (µm-3) in the different pH conditions
1	482	223	443.811	0.502466	1	8.5	1	8.5
2	375	202	267.204	0.755977	1	8.5	2	8.5
3	1704	953	607.113	1.56972	2	7.4	3	7.4
4	729	343	333.586	1.02822	3	7.4	4	7.4
5	933	467	325.677	1.43394	3	7.4	5	7.4
6	1682	900	481.689	1.86843	4	7.4	6	7.4
7	1200	641	381.203	1.68152	4	7.4	7	7.4
8	1703	942	1104.21	0.853095	5	6.5	8	6.5
9	1742	1059	976.087	1.08494	5	6.5	9	6.5
10	335	183	376.274	0.486348	6	6.5	10	6.5
11	170	89	377.766	0.235596	6	6.5	11	6.5
12	619	343	454.286	0.755031	7	8.5	12	8.5
13	327	191	293.038	0.651793	7	8.5	13	8.5
	7.4	6.5	8.5
Density	1.56972	0.853095	0.502466
Density	1.02822	1.08494	0.755977
Density	1.43394	0.486348	0.755031
Density	1.86843	0.235503	0.651793
Density	1.68152
Mean	1.51636	0.664973	0.666317
SD	0.257924	0.292615	0.0927008
t-Test: Two-Sample Assuming Unequal Variances				t-Test: Two-Sample Assuming Unequal Variances
	7.4	6.5			7.4	8.5
Mean	1.51636	0.664973		Mean	1.51636	0.666317
Variance	0.0997871	0.142706		Variance	0.0997871	0.0143224
Observations	5	4		Observations	5	4
Hypothesized Mean Difference	0			Hypothesized Mean Difference	0
df	6			df	5
t Stat	3.60961			t Stat	5.54062
P(T<=t) one-tail	0.00561809			P(T<=t) one-tail	0.00131436
t Critical one-tail	1.94318			t Critical one-tail	2.01505
P(T<=t) two-tail	0.0112362			P(T<=t) two-tail	0.00262872
t Critical two-tail	2.44691			t Critical two-tail	2.57058
