# Supplementary material for: ExSTED microscopy reveals contrasting functions of dopamine and somatostatin CSF-c neurons along the lamprey central canal
Source: eLife. 2022 Feb 1;11:e73114. doi: 10.7554/eLife.73114 (PMC8809891; doi:10.7554/eLife.73114)
Supplement: Figure 3—source data 1. — Quantification of somatostatin DCVs number density in cell area of somatostatin-expressing CSF-c neurons (µm–2) in the different pH. [file elife-73114-fig3-data1.xlsx]

## Sheet: Figure 3G
Slice	Vesicles (<0.196 um2)	Cell Area(um2)	Density	pH		Quantification of somatostatin DCVs number density in cell area (µm-2) in the different pH																		cell area
som. pH 7.4	207	121.722	1.7006	7.4																				236.6
som conf.sted-2 pH 7.4	239	175.858	1.35905	7.4			pH 7.4	pH 6.5	pH 8.5															126
som conf.sted-3 pH 8.5	219	168.272	1.30146	8.5		Number Density	1.7	0.98	1.3															185.1
som conf.sted pH 7.4	188	131.696	1.42753	7.4		µm-2	1.42	1.06	1.23															237
som kk conf sted-3 pH 7.4	167	112.582	1.48336	7.4			1.48	0.51	1.38															97.1
som kk tubulin 594, pH 7.4	187	80.384	2.32633	7.4			2.32	0.92	1.16															87.9
som tubulin conf.sted-4 pH 7.4	129	54.309	2.3753	7.4			2.37	1.14	0.8															125.8
som conf.sted-2 pH 8.5	214	173.421	1.23399	8.5			1.53	0.37	0.41															70.5
som conf.sted-3 pH 8.5	173	125.307	1.38061	8.5			1.47	1.23	0.62															178.1
som conf.sted pH 7.4	152	99.175	1.53264	7.4			1.86	1.02	1.4															164
som tubulin conf sted-2 pH 7.4	108	73.193	1.47555	7.4			1.42	0.75	1.16															201
som tubulin conf sted pH 8.5	73	62.409	1.1697	8.5			1.62	1.27	0.95															313
som tubulin conf sted pH 6.5	238	242.606	0.981014	6.5			1.78	1.28	0.42															191.6
som tubulin conf sted pH 6.5	293	276.111	1.06117	6.5			1.45	1.7	0.99															170.285
som tubulin conf sted pH 6.5	157	303.495	0.517307	6.5			1.35	1.06	0.61															66.2016
som tubulin conf sted-1 pH 6.5	124	134.116	0.924573	6.5		avrage	1.67462	1.02231	0.956154
som tubulin conf sted-2 pH 8.5	155	191.855	0.807902	8.5		SD	0.320495	0.330644	0.339355
som tubulin conf sted-1 pH 8.5	65	156.252	0.415995	8.5
som tubulin conf-sted-1 pH 8.5	97	155.29	0.624638	8.5		t-Test: Two-Sample Assuming Equal Variances			t-Test: Two-Sample Assuming Equal Variances
som tubulin conf-sted-1 pH 6.5	112	97.554	1.14808	6.5
som tubulin conf-sted-1 pH 6.5	70	188.009	0.372323	6.5			pH 7.4	pH 6.5
somatostatin,tubulin pH 8.5	208	147.951	1.40587	8.5		Mean	1.67462	1.02231	Mean
somatostatin,tubulin-2 pH 8.5	281	240.613	1.16785	8.5		Variance	0.111277	0.118436	Variance
somatostatin tubulin-3 pH 6.5	165	134.832	1.22375	6.5		Observations	13	13	Observations
C1-somatostatin pH 6.5	199	193.338	1.02929	6.5		Pooled Variance	0.114856		Pooled Variance
C1-somatostatin pH 6.5	83	110.302	0.75248	6.5		Hypothesized Mean Difference	0		Hypothesized Mean Difference
som conf sted-1 pH 8.5	197	205.7	0.957705	8.5		df	24		df
slices somatostatin 594 cell 1 pH 7.4	391	210	1.8619	7.4		t Stat	4.90718		t Stat
slices somatostatin 594 cell 2 pH 7.4	290	204	1.42157	7.4		P(T<=t) one-tail	2.6301e-05		P(T<=t) one-tail
slices somatostatin 594 pH 6.5	215	169	1.27219	6.5		t Critical one-tail	1.71088		t Critical one-tail
slices somatostatin 594 -pH 7.4 cell 1	193	150	1.28667	7.4		P(T<=t) two-tail	5.2602e-05		P(T<=t) two-tail
slices somatostatin 594 -pH7.4 cell 2	214	132	1.62121	7.4		t Critical two-tail	2.0639		t Critical two-tail
slices somatostatin 594 -pH 7.4 cell 3	154	128	1.20312	7.4
slices somatostatin 594 -pH 6.5 cell 1	293	164	1.78659	6.5		t-Test: Two-Sample Assuming Equal Variances			t-Test: Two-Sample Assuming Equal Variances
slices somatostatin 594 -pH 6.5 cell 2	129	121	1.06612	6.5
slices somatostatin 594 -pH 8.5 cell 1	174	120	1.45	8.5			pH 7.4	pH 8.5
slices somatostatin 594 -pH 8.5 cell 2	132	133	0.992481	8.5		Mean	1.67462	0.956154	Mean
slices somatostatin 594 -pH 8.5 cell 3	92	150	0.613333	8.5		Variance	0.111277	0.124759	Variance
	39	92	0.423913	8.5		Observations	13	13	Observations
						Pooled Variance	0.118018		Pooled Variance
						Hypothesized Mean Difference	0		Hypothesized Mean Difference
						df	24		df
						t Stat	5.33195		t Stat
						P(T<=t) one-tail	8.987e-06		P(T<=t) one-tail
						t Critical one-tail	1.71088		t Critical one-tail
						P(T<=t) two-tail	1.7974e-05		P(T<=t) two-tail
						t Critical two-tail	2.0639		t Critical two-tail
