# Supplementary material for: ExSTED microscopy reveals contrasting functions of dopamine and somatostatin CSF-c neurons along the lamprey central canal
Source: eLife. 2022 Feb 1;11:e73114. doi: 10.7554/eLife.73114 (PMC8809891; doi:10.7554/eLife.73114)
Supplement: Figure 3—source data 2. — Analysis of the GABA intensity signal in somatostatin-expressing CSF-c neurons in the different pH. [file elife-73114-fig3-data2.xlsx]

## Sheet: Figure3K
	Analysis of the GABA intensity signal in CSF-c neurons at different pH											Normalized	--	--						--
									pH 7.4	pH 6.5	pH 8.5	PH 7.4	pH 6.5	pH 8.5
	t-Test: Two-Sample Assuming Unequal Variances								90.036	82.043	55.001	0.85998	0.40165	0.47659
									92.576	75.082	109.947	0.51018	0.54801	0.40808
		PH 7.4	pH 6.5						105.785	70.23	78.831	0.74877	0.96266	0.80005
	Mean	0.585391	0.548007						80.126	78.458	74.758	0.32456	0.81317	0.16821
	Variance	0.0667883	0.0784341						97.627	101.768	98.06	0.37168	1	0.58053
	Observations	26	24						66.51	93.364	60.498	0.9433	0.58844	1
	Hypothesized Mean Difference	0							69.966	103.867	85.01	0.75832	0.33032	0.81302
	df	47							111.897	80.731	109.947	0	0.32073	0.40808
	t Stat	0.489319							98.328	66.22	98.831	0.80287	0.75091	0.80005
	P(T<=t) one-tail	0.313446							42.702	65.681	74.758	0.86962	0.11157	0
	t Critical one-tail	1.67793							101.596	89.864	98.06	0.84944	0.42556	0.87288
	P(T<=t) two-tail	0.626892							106.492	53.923	50.498	1	0	0.97818
	t Critical two-tail	2.01174							105.012	71.574	102.39	0.79558	0.36482	0.95849
									116.056	47.651	108.65	0.50773	0.45724	0.53357
									101.061	68.16	107.479	0.43178	0.76386	0.80582
	t-Test: Two-Sample Assuming Unequal Variances								79.946	73.355	82.218	0.83441	0.6065	0.45412
									74.375	90.592	98.403	0.16688	0.16102	0.5623
		PH 7.4	pH 8.5						103.909	81.746	77.495	0.39461	0.35911	0.41757
	Mean	0.585391	0.565673						54.943	56.703	83.926	0.41431	0.92173	0.41757
	Variance	0.0667883	0.0783534						71.648	67.839	75.322	0.48022	0.90275	0.24984
	Observations	26	22						73.093	99.467	75.322	0.6481	0.76656	0.51081
	Hypothesized Mean Difference	0							77.928	98.4	65.351	0.41128	0.62546	0.22905
	df	43							90.243	90.744	80.865	0.58028	0.28019
	t Stat	0.251833							72.871	82.812	64.115	0.21428	0.68991
	P(T<=t) one-tail	0.401185							85.268	63.402		0.58184
	t Critical one-tail	1.68107							58.42	86.435		0.72014
	P(T<=t) two-tail	0.80237					MEAN		85.7082	78.4658	83.989	0.585391	0.548007	0.565673
	t Critical two-tail	2.01669					SD		18.5575	14.8392	17.4758	0.253416	0.274164	0.273481
									P value
								pH 7.4 , 6.5	0.626903
								7.4, 8.5	0.802362
		PH 7.4		pH 6.5		pH 8.5
