# Supplementary material for: ExSTED microscopy reveals contrasting functions of dopamine and somatostatin CSF-c neurons along the lamprey central canal
Source: eLife. 2022 Feb 1;11:e73114. doi: 10.7554/eLife.73114 (PMC8809891; doi:10.7554/eLife.73114)
Supplement: Figure 3—source data 3. — Analysis of GABA signal in and outside of somatostatin dense-core vesicles (DCVs) in soma and axon of somatostatin-expressing CSF-c neurons. [file elife-73114-fig3-data3.xlsx]

## Sheet: Figure 3P_soma
	GABA	in som. DCVs		GABA	outside som. DCVs		GABA	in bkg	Analysis of GABA signal in and outside somatostatin DCVs in soma with background
	14.5312			20.7188			3.55769
	13.9167			23.6346			3.3125
	12.9062			17.0385			2.96795
	14.6346			18.375			3.9125
	17.3125			21.9375			4.08824
	12.7812			27.3125			4.96429
	14.4375			11.2188			5.78846		T-tests	p-value
	17.5192			15.1667			3.8625		IN v OUT	0.0194789
	14.4375			12.3125			4		IN v BKG	7.4032e-15
	20.75			19.75			4.88889
	10.8654			25			3.50893
	12.4688			34.8125			3.51786
	12.6154			21.8125			3.25
	15.0625			19.875			1.975
	15.8125			16.3333			2.30063
	9.33333			15.15			2.26282
	17.625			12.8			2.5625
	17.9167			18.9808			4.05769
	16.0625			21.0625			3.425
	11.5938			18.7308
	20.3438			16.0938
	21.4688			11.1923
				13.5938
				13
				13.5577
Mean	15.1998			18.3784			3.58966
Std	3.13222			5.44401			0.943951
	GABA	in som. DCVs		GABA	outside som. DCVs		GABA	in bkg	Analysis of GABA signal in and outside somatostatin in axons with background
	17.3594			16.6486			3.55769
	14.0312			16			3.3125
	11.75			13.6923			2.96795
	12.8438			18.1159			3.9125
	7.96154			13.1875			4.08824
	13.5625			15.5			4.96429
	14.5625			12			5.78846
	13.8438			15.8649			3.8625		T-tests	p-value
									IN v OUT	0.411084
Mean	13.2393			15.1262			4.05677		IN v BKG	7.93233e-05
Std	2.5013			1.88059			0.856624
