# Supplementary material for: ExSTED microscopy reveals contrasting functions of dopamine and somatostatin CSF-c neurons along the lamprey central canal
Source: eLife. 2022 Feb 1;11:e73114. doi: 10.7554/eLife.73114 (PMC8809891; doi:10.7554/eLife.73114)
Supplement: Figure 4—figure supplement 1—source data 1. — Quantification of dopamine DCVs number density in cell volume (µm−3) of dopaminergic CSF-c neurons in the different pH conditions. [file elife-73114-fig4-figsupp1-data1.xlsx]

## Sheet: Figure 4-figure supplement 1D
Cell	Vesicles ALL	Vesicles (<0.08um3)	Cell Volume(um3)	Density	zstack	pH		Quantification of the Dopamine DCVs number density in cell volume (µm-3) in the different pH conditions
1	265	219	676.241	0.323849	1	7.4
2	198	143	373.776	0.382582	2	6.5
3	118	99	359.085	0.275701	3	6.5
4	196	152	332.69	0.456882	4	8.5
5	189	151	259.617	0.581626	5	8.5
6	212	175	243.37	0.71907	6	6.5
7	201	98	149.851	0.653985	7	7.4
8	130	67	122.033	0.549033	7	7.4
pH	7.4	6.5	8.5
Density	0.323849	0.382582	0.456882
	0.549033	0.275701	0.581626
	0.653985	0.71907
Mean	0.508956	0.459118	0.519254
SD	0.137725	0.188922	0.062372
t-Test: Two-Sample Assuming Equal Variances
				t-Test: Two-Sample Assuming Unequal Variances
	7.4	6.5
Mean	0.508956	0.459118			7.4	8.5
Variance	0.0284521	0.0535373		Mean	0.508956	0.519254
Observations	3	3		Variance	0.0284521	0.00778053
Pooled Variance	0.0409947			Observations	3	2
Hypothesized Mean Difference	0			Hypothesized Mean Difference	0
df	4			df	3
t Stat	0.301469			t Stat	-0.0890495
P(T<=t) one-tail	0.38904			P(T<=t) one-tail	0.467327
t Critical one-tail	2.13185			t Critical one-tail	2.35336
P(T<=t) two-tail	0.77808			P(T<=t) two-tail	0.934654
t Critical two-tail	2.77645			t Critical two-tail	3.18245
