# Supplementary material for: ExSTED microscopy reveals contrasting functions of dopamine and somatostatin CSF-c neurons along the lamprey central canal
Source: eLife. 2022 Feb 1;11:e73114. doi: 10.7554/eLife.73114 (PMC8809891; doi:10.7554/eLife.73114)
Supplement: Figure 4—source data 1. — Quantification of dopamine DCVs number density in cell area (µm−2) in dopaminergic CSF-c neurons in the different pH. [file elife-73114-fig4-data1.xlsx]

## Sheet: Figure 4D
Cells	slices	Vesicles (<0.196 um2)	Area (um2)	Density	PH			pH 7.4	pH 6.5	pH 8.5		Quantification of Dopamine DCVs number density in cell area
1	dopamin conf sted-1 cell 1	198	137	1.44526	7.4			1.44526	0.640777	0.421739		(µm-2) in the different pH
2	dopamin conf sted -1cell 2	72	109	0.66055	7.4			0.66055	0.963855	0.956522
3	dopamin conf sted-2 cell	55	82	0.670732	7.4			0.670732	1.2451	0.756944
4	dopamin sted -3	193	126	1.53175	7.4			1.53175	1.1828	0.446602
5	dopamin sted 1 cell 1	213	107	1.99065	7.4			1.99065	0.875912	0.522727
6	dopamin sted 1 cell 2	343	214	1.6028	7.4			1.6028	0.506667	0.604651
7	measurment 7 dopamine	202	230	0.878261	7.4			0.878261	0.672619	0.9
8	dopamine 635 cell -1	80	96	0.833333	7.4			0.833333	0.490741	1.00943
9	dopamine 635 cell -2	60	111	0.540541	7.4			0.540541	0.681818	1.47664
10	dopamine 635 cof sted2	112	148	0.756757	7.4			0.756757	1.4898	1.5931
11	dopamine 635 cof sted3 cell 1	66	103	0.640777	6.5		avrage	1.09106	0.875008	0.868836
12	dopamine 635 cof sted3 cell 2	160	166	0.963855	6.5		SD	0.477427	0.321565	0.387646
13	dopamine 635 cof sted 4	127	102	1.2451	6.5			0
14	dopamine 635 cof sted 5	110	93	1.1828	6.5
15	measurment 5 cell 1	240	274	0.875912	6.5
16	Measurement5 cell 2	76	150	0.506667	6.5		t-Test: Two-Sample Assuming Equal Variances				t-Test: Two-Sample Assuming Equal Variances
17	measurment 6	113	168	0.672619	6.5
18	project 2-image 012	106	216	0.490741	6.5			pH 7.4	pH 6.5			pH 7.4	pH 8.5
19	project 2-image 009	60	88	0.681818	6.5		Mean	1.09106	0.875008		Mean	1.09106	0.868836
20	dopamin con sted body	219	147	1.4898	6.5		Variance	0.253262	0.114894		Variance	0.253262	0.166966
21	dopamine 594 formlin fix	97	230	0.421739	8.5		Observations	10	10		Observations	10	10
22	dopamine 635	110	115	0.956522	8.5		Pooled Variance	0.184078			Pooled Variance	0.210114
23	dopamine syted 1 w	109	144	0.756944	8.5		Hypothesized Mean Difference	0			Hypothesized Mean Difference	0
24	dopamin conf sted -1cell 2	46	103	0.446602	8.5		df	18			df	18
25	dopamin conf sted 2	46	88	0.522727	8.5		t Stat	1.12603			t Stat	1.08406
26	dopamine conf sted 3 cell 1	78	129	0.604651	8.5		P(T<=t) one-tail	0.137472			P(T<=t) one-tail	0.146322
27	dopamine conf sted -3	135	150	0.9	8.5		t Critical one-tail	1.73406			t Critical one-tail	1.73406
28	dopamin sted-1 cell 1	214	212	1.00943	8.5		P(T<=t) two-tail	0.274943			P(T<=t) two-tail	0.292644
29	dopamin sted 1 cell 2	158	107	1.47664	8.5		t Critical two-tail	2.10092			t Critical two-tail	2.10092
30	dopamine sted 1 cell 3	231	145	1.5931	8.5
