# Supplementary material for: ExSTED microscopy reveals contrasting functions of dopamine and somatostatin CSF-c neurons along the lamprey central canal
Source: eLife. 2022 Feb 1;11:e73114. doi: 10.7554/eLife.73114 (PMC8809891; doi:10.7554/eLife.73114)
Supplement: Figure 4—source data 2. — Quantification of action potential frequency in dopaminergic CSF-c neurons at different pH conditions during 1 min. [file elife-73114-fig4-data2.xlsx]

## Sheet: Figure 4I
										pH 7.4	%	pH 6.5	%	pH 8.5	%
		Action potential frequency in Dopamine expressing CSF-c neurons at different pH							cell 1	12	100	13	108.3	14	116.667
		During 1 min							cell 2	24	100	25	104.1	20	83.3
									cell 3	6	100	7	116.6	8	133.333
									cell 4	20	100	23	115	25	125
									cell 5	10	100	15	150	12	120
									cell 6	7	100	9	128.5	8	114.286
	p Value								cell 7	13	100	16	123	14	107.692
7.4-6.5	0.121053								cell 8	6	100	9	128.5	8	133.333
7.4-8.5	0.100696								cell 9	15	100	13	86.6	16	106.667
									cell 10	5	100	8	160	8	160
									cell 11	20	100	18	90	21	105
									cell 12	14	100	14	100	16	114.286
	t-Test: Paired Two Sample for Means								cell13	16	100	18	112.5	14	87.5
									cell 14	18	100	12	66.6667	16	88.8889
		pH 7.4	pH 6.5						cell 15	20	100	19	95	21	105
	Mean	13.7333	14.6						MEAN	13.7333	100	14.6	112.318	14.7333	113.397
	Variance	36.2095	28.5429						SD	5.81339	0	5.1614	23.2891	5.20854	19.241
	Observations	15	15
	Pearson Correlation	0.889623
	Hypothesized Mean Difference	0
	df	14
	t Stat	-1.22139
	P(T<=t) one-tail	0.121053
	t Critical one-tail	1.76131						pH 7.4	pH 6.5	pH 8.5
	P(T<=t) two-tail	0.242107					mean	13.73	14.6	14.7
	t Critical two-tail	2.14479					sd	5.8	5.1	5.2
	t-Test: Paired Two Sample for Means
		pH 7.4	pH 8.5
	Mean	13.7333	14.7333
	Variance	36.2095	29.0667
	Observations	15	15
	Pearson Correlation	0.931183
	Hypothesized Mean Difference	0
	df	14
	t Stat	-1.75734
	P(T<=t) one-tail	0.050348
	t Critical one-tail	1.76131
	P(T<=t) two-tail	0.100696
	t Critical two-tail	2.14479
