# Supplementary material for: ExSTED microscopy reveals contrasting functions of dopamine and somatostatin CSF-c neurons along the lamprey central canal
Source: eLife. 2022 Feb 1;11:e73114. doi: 10.7554/eLife.73114 (PMC8809891; doi:10.7554/eLife.73114)
Supplement: Figure 5—figure supplement 2—source data 1. [file elife-73114-fig5-figsupp2-data1.xlsx]

## Sheet: Figure 5-figure supplement 2
			Quantification of cilia diameters (nm) measured in the different techniques; confocal, STED, ExM, and ExSTED
Diameter								Diameter			divided to expansion factor 4,53
FWHM	confocal	STED	ExM	ExSTED				FWHM	confocal	STED	ExM	ExSTED
	400	220	1215	990					400	220	270	220
	390	210	1260	945					390	210	280	240
	330	240	1305	1080					330	240	290	230
	450	280	1215	1260					450	280	270	200
	470	260	1147	1170					430	260	255	190
	400	220	1080	990					400	220	240	180
	410	260	1170	1170					410	260	260	220
	432	240	1305	1080					432	240	290	230
	440	220	1125	900					440	220	250	240
	410	200	1170	900					410	200	260	200
	390	270	1260	1215					390	270	280	255
	380	220	1350	990					380	220	300	220
	380	230	1215	1035					380	230	250	230
	385	250	1260	1125					385	250	230	210
	398	240	1170	1080					398	240	270	210
	400	240	1197	1080					400	240	280	220
	410	250	1147	1125					410	250	260	220
	415	255	1125	1147					415	255	266	230
	400	260	1035	1170					400	260	255	200
MEAN	404.737	240.263	1197.42	1076.42				MEAN	402.632	240.263	266.105	218.158
								SD	25.697	20.9306	17.4383	18.1522				confocal	STED	ExM	ExSTED
																402.632	240.263	266.105	218.158
	t-Test: Two-Sample Assuming Equal Variances				t-Test: Two-Sample Assuming Equal Variances				t-Test: Two-Sample Assuming Equal Variances
		confocal	STED			confocal	ExM			confocal	ExSTED			STED	ExSTED	Expansion factor
	Mean	402.632	240.263		Mean	402.632	266.105		Mean	402.632	218.158			220	990
	Variance	697.023	462.427		Variance	697.023	320.988		Variance	697.023	347.807			210	945
	Observations	19	19		Observations	19	19		Observations	19	19			240	1080
	Pooled Variance	579.725			Pooled Variance	509.006			Pooled Variance	522.415				280	1260
	Hypothesized Mean Difference	0			Hypothesized Mean Difference	0			Hypothesized Mean Difference	0				260	1170
	df	36			df	36			df	36				220	990
	t Stat	20.7851			t Stat	18.6516			t Stat	24.8764				260	1170
	P(T<=t) one-tail	6.09325e-22			P(T<=t) one-tail	2.17676e-20			P(T<=t) one-tail	1.42692e-24				240	1080
	t Critical one-tail	1.6883			t Critical one-tail	1.6883			t Critical one-tail	1.6883				220	900
	P(T<=t) two-tail	1.21865e-21			P(T<=t) two-tail	4.35351e-20			P(T<=t) two-tail	2.85384e-24				200	900
	t Critical two-tail	2.02809			t Critical two-tail	2.02809			t Critical two-tail	2.02809				270	1215
														220	990
														230	1035
														250	1125
	t-Test: Two-Sample Assuming Equal Variances				t-Test: Two-Sample Assuming Equal Variances				t-Test: Two-Sample Assuming Equal Variances					240	1080
														240	1080
		STED	ExM			STED	ExSTED			ExM	ExSTED			250	1125
	Mean	240.263	266.105		Mean	240.263	218.158		Mean	266.105	218.158			255	1147
	Variance	462.427	320.988		Variance	462.427	347.807		Variance	320.988	347.807			260	1170
	Observations	19	19		Observations	19	19		Observations	19	19		Mean	240.263	1076.42	4.48018
	Pooled Variance	391.708			Pooled Variance	405.117			Pooled Variance	334.398
	Hypothesized Mean Difference	0			Hypothesized Mean Difference	0			Hypothesized Mean Difference	0
	df	36			df	36			df	36
	t Stat	-4.02447			t Stat	3.38507			t Stat	8.08156
	P(T<=t) one-tail	0.000140343			P(T<=t) one-tail	0.000865831			P(T<=t) one-tail	6.61553e-10
	t Critical one-tail	1.6883			t Critical one-tail	1.6883			t Critical one-tail	1.6883
	P(T<=t) two-tail	0.000280686			P(T<=t) two-tail	0.00173166			P(T<=t) two-tail	1.32311e-09
	t Critical two-tail	2.02809			t Critical two-tail	2.02809			t Critical two-tail	2.02809
