# Supplementary material for: ExSTED microscopy reveals contrasting functions of dopamine and somatostatin CSF-c neurons along the lamprey central canal
Source: eLife. 2022 Feb 1;11:e73114. doi: 10.7554/eLife.73114 (PMC8809891; doi:10.7554/eLife.73114)
Supplement: Figure 5—source data 1. [file elife-73114-fig5-data1.xlsx]

## Sheet: Figure 5E
	Distance(microns)	Intensity	Normalized Intensity			Quantification of the cilium diameter (micrometer) with confocal microscopy
	0.00504	61.125	0.149
	0.01513	61.639	0.1542			Cilia diameter confocal non expanded
	0.02522	61.0926	0.14868
	0.03531	59.654	0.13414
	0.0454	60.6161	0.14386
	0.05549	68.1562	0.22008
	0.06558	71.3482	0.25234
	0.07566	71.7958	0.25686
	0.08575	74.4464	0.28366
	0.09584	79.9135	0.33892
	0.10593	89.8315	0.43917
	0.11602	92.6367	0.46753
	0.12611	96.221	0.50376
	0.1362	104.011	0.5825
	0.14629	109.723	0.64024
	0.15637	116.876	0.71254
	0.16646	121.982	0.76415
	0.17655	124.168	0.78625
	0.18664	125.929	0.80404
	0.19673	125.92	0.80396
	0.20682	131.078	0.8561
	0.21691	133.35	0.87906
	0.22699	132.795	0.87345
	0.23708	133.844	0.88406
	0.24717	136.42	0.91009
	0.25726	137.359	0.91959
	0.26735	138.714	0.93328
	0.27744	140.671	0.95306
	0.28753	141.598	0.96243
	0.29762	145.315	1
	0.3077	144.45	0.99126
	0.31779	142.585	0.97241
	0.32788	142.857	0.97516
	0.33797	141.261	0.95903
	0.34806	138.194	0.92803
	0.35815	140.791	0.95428
	0.36824	141.821	0.96469
	0.37832	138.671	0.93284
	0.38841	132.911	0.87462
	0.3985	130.713	0.85241
	0.40859	129.08	0.8359
	0.41868	127.722	0.82217
	0.42877	123.491	0.77941
	0.43886	118.133	0.72525
	0.44895	114.924	0.69281
	0.45903	111.948	0.66272
	0.46912	106.214	0.60477
	0.47921	102.665	0.5689
	0.4893	105.339	0.59593
	0.49939	98.3404	0.52518
	0.50948	88.3125	0.42382
	0.51957	78.6724	0.32637
	0.52965	72.6451	0.26545
	0.53974	71.6791	0.25569
	0.54983	68.2478	0.221
	0.55992	63.9916	0.17798
	0.57001	58.1786	0.11922
	0.5801	54.3984	0.08101
	0.59019	53.0446	0.06733
	0.60028	49.2779	0.02925
	0.61036	46.3839	0
	0.62045	47.6406	0.0127
	0.63054	51.288	0.04957
	0.64063	53.0268	0.06715
	0.65072	56.8304	0.10559
