# Supplementary material for: ExSTED microscopy reveals contrasting functions of dopamine and somatostatin CSF-c neurons along the lamprey central canal
Source: eLife. 2022 Feb 1;11:e73114. doi: 10.7554/eLife.73114 (PMC8809891; doi:10.7554/eLife.73114)
Supplement: Figure 5—source data 2. [file elife-73114-fig5-data2.xlsx]

## Sheet: Figure 5F
Cilia diameter STED non expanded							Quantification of the cilium diameter (µm) in STED microscopy
	Distance(microns)	Intensity	Normalized Intensity
	0.00504	51.5491	0
	0.01513	53.0095	0.0109
	0.02522	55.0971	0.02649
	0.03531	57.5033	0.04446
	0.0454	62.3929	0.08097
	0.05549	70.5904	0.14218
	0.06558	76.2054	0.1841
	0.07566	80.2422	0.21425
	0.08575	93.7589	0.31517
	0.09584	107.054	0.41444
	0.10593	117.444	0.49203
	0.11602	124.002	0.54099
	0.12611	132.732	0.60618
	0.1362	155.175	0.77375
	0.14629	175.205	0.92332
	0.15637	170.869	0.89094
	0.16646	160.384	0.81265
	0.17655	167.604	0.86656
	0.18664	169.875	0.88352
	0.19673	160.515	0.81363
	0.20682	146.982	0.71258
	0.21691	143.209	0.68441
	0.22699	147.511	0.71653
	0.23708	141.94	0.67493
	0.24717	132.196	0.60218
	0.25726	135.611	0.62767
	0.26735	138	0.64551
	0.27744	133.631	0.61289
	0.28753	131.375	0.59604
	0.29762	131.414	0.59634
	0.3077	133.41	0.61124
	0.31779	145.912	0.70459
	0.32788	154.674	0.77001
	0.33797	168.328	0.87196
	0.34806	181.93	0.97352
	0.35815	176.041	0.92956
	0.36824	179.268	0.95365
	0.37832	185.475	1
	0.38841	180.259	0.96105
	0.3985	154.662	0.76992
	0.40859	127.277	0.56544
	0.41868	122.214	0.52764
	0.42877	112.43	0.45458
	0.43886	100.313	0.36411
	0.44895	96.9174	0.33876
	0.45903	92.1875	0.30344
	0.46912	80.4732	0.21597
	0.47921	74.2333	0.16938
	0.4893	72.8304	0.1589
	0.49939	71.6239	0.14989
	0.50948	67.8393	0.12164
	0.51957	63.4805	0.08909
	0.52965	61.3393	0.0731
	0.53974	62.8259	0.0842
	0.54983	64.3058	0.09525
	0.55992	62.0485	0.0784
	0.57001	59.2589	0.05757
	0.5801	54.0212	0.01846
	0.59019	54.75	0.0239
	0.60028	57.7511	0.04631
	0.61036	58.3571	0.05083
	0.62045	60.7913	0.06901
	0.63054	60.7433	0.06865
	0.64063	64.4688	0.09647
	0.65072	69.6295	0.135
