# Supplementary material for: ExSTED microscopy reveals contrasting functions of dopamine and somatostatin CSF-c neurons along the lamprey central canal
Source: eLife. 2022 Feb 1;11:e73114. doi: 10.7554/eLife.73114 (PMC8809891; doi:10.7554/eLife.73114)
Supplement: Figure 5—source data 3. [file elife-73114-fig5-data3.xlsx]

## Sheet: Figure 5G
Cilia diameter STED non expanded						Quantification of the cilium diameter (µm) in Expanded-confocal microscopy (ExM)
	Distance(microns)	Intensity	Normalized Intensity
	0.00634	8.0989	0.02462
	0.01902	9.99007	0.04565
	0.0317	11.2118	0.05923
	0.04438	10.5602	0.05199
	0.05705	10.0714	0.04655
	0.06973	10.4104	0.05032
	0.08241	12.2198	0.07044
	0.09509	13.4742	0.08439
	0.10777	13.3658	0.08319
	0.12045	13.795	0.08796
	0.13313	14.4106	0.0948
	0.14581	14.8398	0.09958
	0.15848	14.1868	0.09231
	0.17116	14.0632	0.09094
	0.18384	15.511	0.10704
	0.19652	20.078	0.15782
	0.2092	23.9867	0.20128
	0.22188	22.7071	0.18705
	0.23456	22.1636	0.18101
	0.24723	26.0664	0.22441
	0.25991	27.555	0.24096
	0.27259	31.13	0.28071
	0.28527	38.6429	0.36425
	0.29795	38.0877	0.35807
	0.31063	35.9628	0.33445
	0.32331	45.2815	0.43806
	0.33599	46.8681	0.45571
	0.34866	53.9685	0.53466
	0.36134	59.41	0.59516
	0.37402	56.0938	0.55829
	0.3867	60.1209	0.60307
	0.39938	66.4207	0.67312
	0.41206	69.2143	0.70418
	0.42474	72.2369	0.73779
	0.43742	75.1498	0.77018
	0.45009	82.9222	0.8566
	0.46277	85.5239	0.88553
	0.47545	84.7671	0.87711
	0.48813	87.467	0.90714
	0.50081	89.8791	0.93396
	0.51349	87.9835	0.91288
	0.52617	85.9282	0.89002
	0.53884	89.2855	0.92736
	0.55152	86.7703	0.89939
	0.5642	89.0211	0.92442
	0.57688	93.7682	0.9772
	0.58956	87.1758	0.9039
	0.60224	79.5053	0.81861
	0.61492	76.5275	0.7855
	0.6276	71.7113	0.73194
	0.64027	72.3459	0.739
	0.65295	77.008	0.79084
	0.66563	75.5934	0.77511
	0.67831	67.8068	0.68853
	0.69099	60.1665	0.60357
	0.70367	58.5393	0.58548
	0.71635	61.3571	0.61681
	0.72903	66.0547	0.66905
	0.7417	68.4725	0.69593
	0.75438	64.4307	0.65099
	0.76706	63.6078	0.64184
	0.77974	67.5084	0.68521
	0.79242	68.5034	0.69627
	0.8051	61.5991	0.6195
	0.81778	65.4066	0.66184
	0.83045	62.7692	0.63251
	0.84313	59.2747	0.59366
	0.85581	61.3795	0.61706
	0.86849	63.9144	0.64525
	0.88117	61.3216	0.61642
	0.89385	60.7555	0.61012
	0.90653	64.0786	0.64707
	0.91921	58.8407	0.58883
	0.93188	56.9723	0.56806
	0.94456	62.7912	0.63276
	0.95724	62.6659	0.63137
	0.96992	63.3939	0.63946
	0.9826	64.1752	0.64815
	0.99528	62.5082	0.62961
	1.00796	62.3781	0.62817
	1.02064	61.1367	0.61436
	1.03331	60.5797	0.60817
	1.04599	59.7637	0.5991
	1.05867	60.3328	0.60542
	1.07135	58.0989	0.58058
	1.08403	60.9873	0.6127
	1.09671	60.2244	0.60422
	1.10939	61.3464	0.61669
	1.12207	64.7105	0.6541
	1.13474	58.1376	0.58101
	1.14742	64.0879	0.64718
	1.1601	60.6621	0.60908
	1.17278	64.9011	0.65622
	1.18546	63.6902	0.64276
	1.19814	63.2889	0.63829
	1.21082	67.2608	0.68246
	1.22349	63.4918	0.64055
	1.23617	66.4079	0.67297
	1.24885	73.7582	0.7547
	1.26153	74.0023	0.75742
	1.27421	76.8132	0.78867
	1.28689	77.6057	0.79748
	1.29957	70.2065	0.71521
	1.31225	77.9017	0.80078
	1.32492	80.6209	0.83101
	1.3376	85.4537	0.88475
	1.35028	89.5017	0.92976
	1.36296	91.2278	0.94895
	1.37564	89.7802	0.93286
	1.38832	91.1936	0.94857
	1.401	95.8187	1
	1.41368	86.9284	0.90115
	1.42635	88.0537	0.91366
	1.43903	83.4947	0.86297
	1.45171	80.9996	0.83522
	1.46439	80.1465	0.82574
	1.47707	77.6209	0.79765
	1.48975	72.75	0.74349
	1.50243	67.2582	0.68243
	1.5151	60.1382	0.60326
	1.52778	60.9662	0.61247
	1.54046	55.9592	0.55679
	1.55314	53.4584	0.52898
	1.56582	48.9888	0.47929
	1.5785	43.9011	0.42272
	1.59118	38.7276	0.36519
	1.60386	33.1099	0.30272
	1.61653	30.4444	0.27309
	1.62921	27.7096	0.24268
	1.64189	25.3563	0.21651
	1.65457	23.2308	0.19288
	1.66725	19.1084	0.14704
	1.67993	17.3035	0.12697
	1.69261	14.4039	0.09473
	1.70529	16.3187	0.11602
	1.71796	15.411	0.10593
	1.73064	13.0385	0.07955
	1.74332	11.5125	0.06258
	1.756	10.3584	0.04975
	1.76868	11.5926	0.06347
	1.78136	10.8356	0.05505
	1.79404	9.77134	0.04322
	1.80671	10.956	0.05639
	1.81939	10.2445	0.04848
	1.83207	10.967	0.05651
	1.84475	9.56826	0.04096
	1.85743	10.2156	0.04816
	1.87011	10.8058	0.05472
	1.88279	10.3326	0.04946
	1.89547	8.16526	0.02536
	1.90814	7.10989	0.01362
	1.92082	6.33939	0.00506
	1.9335	6.86264	0.01087
	1.94618	6.11031	0.00251
	1.95886	6.86898	0.01095
	1.97154	7.29311	0.01566
	1.98422	5.88462	0
