# Supplementary material for: ExSTED microscopy reveals contrasting functions of dopamine and somatostatin CSF-c neurons along the lamprey central canal
Source: eLife. 2022 Feb 1;11:e73114. doi: 10.7554/eLife.73114 (PMC8809891; doi:10.7554/eLife.73114)
Supplement: Figure 5—source data 4. [file elife-73114-fig5-data4.xlsx]

## Sheet: Figure 5H
Cilia diameter confocal expanded (ExM)	Distance(microns)	Intensity	Normalized Intensity			Quantification of the cilium diameter (µm) in Expanded-STED microscopy (ExSTED)
	0.00517	11.5783	0.05477
	0.01551	14.2584	0.08258
	0.02586	13.9789	0.07968
	0.0362	10.9096	0.04783
	0.04654	10.8323	0.04703
	0.05689	12.5891	0.06526
	0.06723	11.0897	0.0497
	0.07757	9.45049	0.03269
	0.08792	10.6507	0.04515
	0.09826	11.4489	0.05343
	0.1086	11.554	0.05452
	0.11894	11.8894	0.058
	0.12929	10.8077	0.04677
	0.13963	8.36149	0.02139
	0.14997	8.41101	0.02191
	0.16032	10.8872	0.0476
	0.17066	11.3997	0.05292
	0.181	9.51606	0.03337
	0.19135	10.1305	0.03975
	0.20169	9.56211	0.03385
	0.21203	9.14411	0.02951
	0.22238	9.62422	0.03449
	0.23272	9.64778	0.03474
	0.24306	12.1265	0.06046
	0.2534	11.893	0.05804
	0.26375	10.1791	0.04025
	0.27409	12.2601	0.06185
	0.28443	13.2227	0.07183
	0.29478	10.6945	0.0456
	0.30512	11.236	0.05122
	0.31546	11.3504	0.05241
	0.32581	10.4737	0.04331
	0.33615	11.624	0.05525
	0.34649	12.5235	0.06458
	0.35683	11.8485	0.05757
	0.36718	9.8736	0.03708
	0.37752	8.48352	0.02266
	0.38786	10.5015	0.0436
	0.39821	10.3238	0.04175
	0.40855	9.63054	0.03456
	0.41889	10.9848	0.04861
	0.42924	11.8425	0.05751
	0.43958	11.0974	0.04978
	0.44992	11.8876	0.05798
	0.46027	13.9511	0.07939
	0.47061	13.2366	0.07198
	0.48095	10.6561	0.0452
	0.49129	13.6651	0.07643
	0.50164	17.2588	0.11372
	0.51198	16.3705	0.1045
	0.52232	13.7964	0.07779
	0.53267	10.5612	0.04422
	0.54301	12.176	0.06097
	0.55335	14.6652	0.0868
	0.5637	16.4535	0.10536
	0.57404	15.3566	0.09398
	0.58438	12.5161	0.0645
	0.59472	13.561	0.07534
	0.60507	15.7748	0.09832
	0.61541	16.8494	0.10947
	0.62575	14.5785	0.0859
	0.6361	14.5792	0.08591
	0.64644	13.6548	0.07632
	0.65678	12.7985	0.06743
	0.66713	14.837	0.08859
	0.67747	16.4791	0.10563
	0.68781	18.0382	0.1218
	0.69815	21.2382	0.15501
	0.7085	20.6597	0.14901
	0.71884	17.7963	0.11929
	0.72918	18.5838	0.12747
	0.73953	26.4843	0.20945
	0.74987	33.5628	0.2829
	0.76021	38.8259	0.33751
	0.77056	45.1718	0.40336
	0.7809	56.3553	0.51941
	0.79124	69.0982	0.65164
	0.80159	75.0668	0.71357
	0.81193	82.2361	0.78797
	0.82227	95.3632	0.92418
	0.83261	102.67	1
	0.84296	99.6674	0.96885
	0.8533	91.7716	0.88691
	0.86364	84.1202	0.80752
	0.87399	77.0989	0.73466
	0.88433	70.0646	0.66167
	0.89467	65.7083	0.61646
	0.90502	64.9167	0.60825
	0.91536	62.2365	0.58044
	0.9257	54.3654	0.49876
	0.93604	51.1425	0.46532
	0.94639	50.0397	0.45387
	0.95673	46.277	0.41483
	0.96707	45.1217	0.40284
	0.97742	39.8681	0.34833
	0.98776	34.9065	0.29684
	0.9981	33.0189	0.27725
	1.00845	30.1142	0.24711
	1.01879	32.9312	0.27634
	1.02913	37.213	0.32078
	1.03948	35.9214	0.30737
	1.04982	31.6947	0.26351
	1.06016	32.1116	0.26784
	1.0705	30.6851	0.25304
	1.08085	26.2684	0.20721
	1.09119	28.1458	0.22669
	1.10153	29.911	0.24501
	1.11188	31.7696	0.26429
	1.12222	34.0721	0.28818
	1.13256	36.0239	0.30844
	1.14291	32.2573	0.26935
	1.15325	28.5751	0.23114
	1.16359	30.0347	0.24629
	1.17393	28.364	0.22895
	1.18428	28.7304	0.23275
	1.19462	32.8627	0.27563
	1.20496	31.087	0.25721
	1.21531	28.0325	0.22551
	1.22565	29.1486	0.23709
	1.23599	28.2844	0.22813
	1.24634	30.0739	0.2467
	1.25668	30.9792	0.25609
	1.26702	30.0341	0.24628
	1.27737	34.8655	0.29642
	1.28771	36.0494	0.3087
	1.29805	36.0123	0.30832
	1.30839	39.6678	0.34625
	1.31874	40.3174	0.35299
	1.32908	40.1208	0.35095
	1.33942	37.7466	0.32631
	1.34977	36.0735	0.30895
	1.36011	35.068	0.29852
	1.37045	31.3796	0.26024
	1.3808	32.5383	0.27227
	1.39114	34.6071	0.29374
	1.40148	36.6639	0.31508
	1.41182	37.9303	0.32822
	1.42217	37.0603	0.31919
	1.43251	39.2183	0.34158
	1.44285	34.8571	0.29633
	1.4532	30.3519	0.24958
	1.46354	31.7571	0.26416
	1.47388	35.5795	0.30383
	1.48423	34.6324	0.294
	1.49457	36.8054	0.31655
	1.50491	40.8224	0.35823
	1.51525	41.2713	0.36289
	1.5256	42.3736	0.37433
	1.53594	43.5579	0.38661
	1.54628	40.6805	0.35676
	1.55663	40.4315	0.35417
	1.56697	39.6881	0.34646
	1.57731	39.2168	0.34157
	1.58766	45.1314	0.40294
	1.598	46.5489	0.41765
	1.60834	46.1922	0.41395
	1.61869	51.9622	0.47382
	1.62903	50.5803	0.45948
	1.63937	53.7933	0.49282
	1.64971	63.5396	0.59396
	1.66006	73.4047	0.69633
	1.6704	78.727	0.75155
	1.68074	81.2762	0.77801
	1.69109	91.3242	0.88227
	1.70143	92.8487	0.89809
	1.71177	92.6057	0.89557
	1.72212	97.3807	0.94512
	1.73246	90.8999	0.87787
	1.7428	83.6353	0.80249
	1.75314	81.4109	0.7794
	1.76349	76.9639	0.73326
	1.77383	68.4115	0.64451
	1.78417	60.913	0.5667
	1.79452	57.4413	0.53068
	1.80486	53.871	0.49363
	1.8152	49.4372	0.44762
	1.82555	44.6178	0.39761
	1.83589	39.8798	0.34845
	1.84623	33.9986	0.28742
	1.85657	28.2978	0.22827
	1.86692	24.3069	0.18685
	1.87726	25.2436	0.19657
	1.8876	25.7076	0.20139
	1.89795	20.782	0.15028
	1.90829	19.1736	0.13359
	1.91863	18.105	0.1225
	1.92898	16.2278	0.10302
	1.93932	16.0571	0.10125
	1.94966	17.3709	0.11488
	1.96001	16.704	0.10796
	1.97035	15.0034	0.09031
	1.98069	14.5726	0.08584
	1.99103	12.7584	0.06702
	2.00138	10.9264	0.04801
	2.01172	11.1388	0.05021
	2.02206	9.53913	0.03361
	2.03241	8.2478	0.02021
	2.04275	9.1528	0.0296
	2.05309	9.90431	0.0374
	2.06344	9.4079	0.03225
	2.07378	9.70875	0.03537
	2.08412	10.1742	0.0402
	2.09446	10.5386	0.04398
	2.10481	9.83727	0.03671
	2.11515	8.50135	0.02284
	2.12549	8.21263	0.01985
	2.13584	8.4694	0.02251
	2.14618	8.3928	0.02172
	2.15652	7.80477	0.01561
	2.16687	9.0795	0.02884
	2.17721	7.81645	0.01574
	2.18755	6.3	0
	2.19789	8.19367	0.01965
	2.20824	7.97294	0.01736
	2.21858	8.80818	0.02603
	2.22892	9.6261	0.03451
	2.23927	8.21139	0.01983
	2.24961	8.26149	0.02035
	2.25995	8.89778	0.02696
	2.2703	8.93478	0.02734
	2.28064	8.24595	0.02019
	2.29098	8.26813	0.02042
	2.30133	8.03799	0.01803
	2.31167	8.82225	0.02617
	2.32201	9.16694	0.02975
	2.33235	8.28137	0.02056
	2.3427	9.1196	0.02926
	2.35304	10.1888	0.04035
	2.36338	9.29002	0.03103
	2.37373	10.7964	0.04666
	2.38407	11.4705	0.05365
