# Supplementary material for: ExSTED microscopy reveals contrasting functions of dopamine and somatostatin CSF-c neurons along the lamprey central canal
Source: eLife. 2022 Feb 1;11:e73114. doi: 10.7554/eLife.73114 (PMC8809891; doi:10.7554/eLife.73114)
Supplement: Figure 5—source data 5. [file elife-73114-fig5-data5.xlsx]

## Sheet: Figure 5M
Cilia diameter ExSTED deconvolated 9+0											Quantification of the cilium (9+0) diameter (µm) in Expanded-STED microscopy (ExSTED- deconvolated)
					Distance_(microns)		Gray_Value(intensity)	Normalized Intensity
					0		1.4745	0.00855
					0.01879		1.585	0.01188
					0.03757		1.758	0.01709
					0.05636		1.9986	0.02434
					0.07515		2.1469	0.02881
					0.09394		2.1553	0.02906
					0.11272		2.1304	0.02831
					0.13151		2.0152	0.02484
					0.1503		1.8609	0.02019
					0.16909		1.8653	0.02033
					0.18787		1.812	0.01872
					0.20666		1.8103	0.01867
					0.22545		1.7224	0.01602
					0.24423		1.6091	0.01261
					0.26302		1.4512	0.00785
					0.28181		1.3795	0.00569
					0.3006		1.3503	0.00481
					0.31938		1.4468	0.00772
					0.33817		1.5435	0.01063
					0.35696		1.5251	0.01008
					0.37575		1.5469	0.01074
					0.39453		1.6586	0.0141
					0.41332		1.8106	0.01868
					0.43211		1.9731	0.02357
					0.45089		2.1727	0.02959
					0.46968		2.4424	0.03771
					0.48847		2.7814	0.04792
					0.50726		2.9524	0.05307
					0.52604		2.8873	0.05111
					0.54483		2.6844	0.045
					0.56362		2.5462	0.04084
					0.58241		2.5587	0.04121
					0.60119		2.596	0.04234
					0.61998		2.6894	0.04515
					0.63877		2.8903	0.0512
					0.65755		3.2667	0.06254
					0.67634		3.8693	0.08069
					0.69513		4.9395	0.11293
					0.71392		6.4701	0.15903
					0.7327		8.6723	0.22537
					0.75149		11.8094	0.31986
					0.77028		15.4357	0.4291
					0.78907		19.1654	0.54144
					0.80785		22.7652	0.64988
					0.82664		25.7352	0.73934
					0.84543		28.2533	0.81519
					0.86421		30.9543	0.89655
					0.883		32.3879	0.93973
					0.90179		32.1848	0.93361
					0.92058		31.1044	0.90107
					0.93936		30.135	0.87187
					0.95815		28.9872	0.8373
					0.97694		27.3157	0.78695
					0.99573		24.9261	0.71497
					1.01451		21.8796	0.6232
					1.0333		18.9756	0.53572
					1.05209		16.1332	0.45011
					1.07087		14.1496	0.39036
					1.08966		13.317	0.36528
					1.10845		13.1784	0.3611
					1.12724		13.0717	0.35789
					1.14602		12.5158	0.32114
					1.16481		12.225	0.26238
					1.1836		11.9428	0.22388
					1.20239		11.8986	0.22255
					1.22117		12.2962	0.21453
					1.23996		13.1634	0.20065
					1.25875		13.4723	0.20995
					1.27753		13.6788	0.20617
					1.29632		13.7943	0.19965
					1.31511		13.8675	0.18186
					1.3339		13.6045	0.16394
					1.35268		13.1183	0.15929
					1.37147		12.3826	0.15713
					1.39026		11.8203	0.15019
					1.40905		11.2037	0.14162
					1.42783		10.4083	0.13766
					1.44662		9.8019	0.13939
					1.46541		9.6001	0.12331
					1.48419		9.87	0.13144
					1.50298		9.9563	0.14404
					1.52177		9.8177	0.13987
					1.54056		9.5694	0.14239
					1.55934		9.1809	0.16069
					1.57813		9.13	0.17915
					1.59692		9.2359	0.18234
					1.61571		9.5739	0.19253
					1.63449		9.6949	0.20617
					1.65328		9.731	0.22726
					1.67207		9.5433	0.22516
					1.69085		9.3936	0.24709
					1.70964		9.3663	0.24627
					1.72843		9.4816	0.24975
					1.74722		9.9596	0.26414
					1.766		10.7725	0.28863
					1.78479		12.1128	0.30229
					1.80358		14.3116	0.39524
					1.82237		17.4802	0.49068
					1.84115		20.9634	0.5956
					1.85994		25.1622	0.72208
					1.87873		29.1564	0.84239
					1.89751		31.9896	0.92773
					1.9163		33.2242	0.96492
					1.93509		34.3887	1
					1.95388		34.1572	0.99303
					1.97266		32.2065	0.93427
					1.99145		30.375	0.8791
					2.01024		28.3603	0.81841
					2.02903		24.5488	0.7036
					2.04781		19.7684	0.55961
					2.0666		15.4844	0.43056
					2.08539		11.9575	0.32432
					2.10417		9.1286	0.23911
					2.12296		7.0009	0.17502
					2.14175		5.4013	0.12684
					2.16054		4.3848	0.09622
					2.17932		3.9072	0.08183
					2.19811		3.6451	0.07394
					2.2169		3.4416	0.06781
					2.23569		3.0028	0.05459
					2.25447		2.6713	0.0446
					2.27326		2.5365	0.04054
					2.29205		2.4425	0.03771
					2.31083		2.4403	0.03765
					2.32962		2.4937	0.03926
					2.34841		2.4916	0.03919
					2.3672		2.4316	0.03738
					2.38598		2.3966	0.03633
					2.40477		2.5112	0.03978
					2.42356		2.749	0.04695
					2.44235		2.8806	0.05091
					2.46113		2.7951	0.04833
					2.47992		2.6521	0.04403
					2.49871		2.5267	0.04025
					2.51749		2.3659	0.03541
					2.53628		2.193	0.0302
					2.55507		2.1806	0.02982
					2.57386		2.1548	0.02905
					2.59264		2.0466	0.02579
					2.61143		1.9488	0.02284
					2.63022		1.863	0.02026
					2.64901		1.7466	0.01675
					2.66779		1.5827	0.01181
					2.68658		1.4574	0.00804
					2.70537		1.4439	0.00763
					2.72415		1.4965	0.00922
					2.74294		1.4932	0.00912
					2.76173		1.4159	0.00679
					2.78052		1.3247	0.00404
					2.7993		1.2946	0.00314
					2.81809		1.3137	0.00371
					2.83688		1.3622	0.00517
					2.85567		1.3545	0.00494
					2.87445		1.3802	0.00571
					2.89324		1.4183	0.00686
					2.91203		1.4196	0.0069
					2.93081		1.3723	0.00548
					2.9496		1.2969	0.0032
					2.96839		1.2901	0.003
					2.98718		1.3034	0.0034
					3.00596		1.3493	0.00478
					3.02475		1.3834	0.00581
					3.04354		1.3812	0.00574
					3.06233		1.3419	0.00456
					3.08111		1.3135	0.00371
					3.0999		1.2263	0.00108
					3.11869		1.1905	0
					3.13747		1.2033	0
					3.15626		1.2511	0.00183
					3.17505		1.3129	0.00369
					3.19384		1.3503	0.00481
