# Supplementary material for: ExSTED microscopy reveals contrasting functions of dopamine and somatostatin CSF-c neurons along the lamprey central canal
Source: eLife. 2022 Feb 1;11:e73114. doi: 10.7554/eLife.73114 (PMC8809891; doi:10.7554/eLife.73114)
Supplement: Figure 5—source data 6. [file elife-73114-fig5-data6.xlsx]

## Sheet: Figure 5R
						Cilia diameter ExSTED deconvolated 9+2				Quantification of the cilium (9+2) diameter (µm) in Expanded-STED microscopy (ExSTED- deconvolated)
	Distance_(microns)	Gray value(Intensity)	Normalized intensity
	0	5.5	0.141449
	0.021	3.4527	0.87517
	0.042	2.8161	0.0374622
	0.063	2.2434	0.918891
	0.084	2.4935	0.0249632
	0.10501	2.1568	0.922022
	0.12601	3.2826	0.0558931
	0.14702	2.6221	0.0303022
	0.16802	3.1752	0.0517319
	0.18902	3.2716	0.0554669
	0.21002	4.7593	0.113107
	0.23102	4.1118	0.0880201
	0.25203	3.5311	0.0655211
	0.27303	3.2484	0.054568
	0.29403	2.4701	0.024413
	0.31503	3.1765	0.0517823
	0.33603	4.5949	0.106738
	0.35703	3.9444	0.0815343
	0.37803	4.0231	0.0845835
	0.39903	4.5423	0.1047
	0.42003	5.3288	0.135172
	0.44105	7.5854	0.222604
	0.46205	5.6979	0.149473
	0.48305	5.8426	0.155079
	0.50405	11.5946	0.377939
	0.52505	14.9751	0.508915
	0.54605	19.7823	0.695169
	0.56705	18.3045	0.637912
	0.58806	20.0832	0.706827
	0.60906	23.5045	0.839384
	0.63006	27.6592	1.00036
	0.65106	26.4566	0.953762
	0.67206	24.1929	0.866056
	0.69306	27.0807	0.977943
	0.71406	23.8889	0.854277
	0.73506	23.7379	0.848427
	0.75606	22.9567	0.81816
	0.77708	23.9312	0.855916
	0.79808	24.6453	0.883584
	0.81908	22.0035	0.781228
	0.84008	18.1051	0.630186
	0.86108	12.8716	0.427416
	0.88208	12.6719	0.419678
	0.90308	15.102	0.513832
	0.92409	15.5875	0.532642
	0.94509	15.2768	0.520604
	0.96609	11.8451	0.387644
	0.98709	11.809	0.386246
	1.00809	10.3789	0.330837
	1.02909	12.3352	0.406633
	1.05009	13.7185	0.460229
	1.0711	12.5	0.413018
	1.0921	12.4055	0.409357
	1.11311	17.8228	0.619248
	1.13411	20.1021	0.707559
	1.15511	21.5709	0.764467
	1.17611	20.4069	0.719368
	1.19711	20.6223	0.727714
	1.21811	16.6396	0.573406
	1.23911	14.7872	0.501635
	1.26012	14.3812	0.485905
	1.28112	14.4542	0.488733
	1.30212	16.6902	0.575366
	1.32312	13.4291	0.449016
	1.34413	9.9269	0.313324
	1.36513	11.4182	0.371104
	1.38613	10.4516	0.333654
	1.40713	9.5867	0.300143
	1.42813	10.0741	0.319028
	1.44914	10.7768	0.346253
	1.47014	13.7045	0.459686
	1.49114	12.0689	0.396315
	1.51214	14.2318	0.480116
	1.53314	17.7937	0.618121
	1.55414	20.2807	0.714479
	1.57514	20.0311	0.704808
	1.59615	15.3481	0.523367
	1.61715	16.4364	0.565533
	1.63816	11.5035	0.374409
	1.65916	11.7737	0.384878
	1.68016	13.2622	0.442549
	1.70116	14.1315	0.47623
	1.72216	15.1118	0.514212
	1.74316	17.0356	0.588749
	1.76416	17.2653	0.597648
	1.78517	18.6667	0.651945
	1.80617	22.4201	0.797369
	1.82717	24.6609	0.884188
	1.84817	23.5551	0.841344
	1.86917	20.7772	0.733716
	1.89017	19.1332	0.670019
	1.91117	20.1164	0.708113
	1.93219	18.6098	0.64974
	1.95319	16.6494	0.573785
	1.97419	14.5801	0.493611
	1.99519	13.3201	0.444793
	2.01619	14.1074	0.475296
	2.03719	12.9531	0.430573
	2.05819	12.0148	0.394219
	2.07919	9.9446	0.31401
	2.10019	7.8069	0.231186
	2.1212	4.7839	0.11406
	2.1422	6.6667	0.187009
	2.1632	5.5321	0.143049
	2.1842	4.2455	0.0932003
	2.2052	7.0236	0.200837
	2.2262	7.0948	0.203596
	2.2472	6.2856	0.172243
	2.26822	6.2474	0.170763
	2.28922	7.4689	0.21809
	2.31022	4.6408	0.108516
	2.33122	4.7543	0.112914
	2.35222	4.4671	0.101786
	2.37322	4.9634	0.121015
	2.39422	5.3893	0.137516
	2.41522	4.7359	0.112201
	2.43622	4.7703	0.113534
	2.45723	4.5675	0.105676
	2.47823	5.2134	0.130701
	2.49923	4.9074	0.118845
	2.52023	6.1234	0.165959
	2.54123	4.6676	0.109554
	2.56224	4.6747	0.10983
	2.58324	5.5854	0.145114
	2.60425	3.4915	0.0639868
	2.62525	2.2922	0.0175203
	2.64625	6.4429	0.178338
	2.66725	4.0219	0.084537
	2.68825	5.3683	0.136703
	2.70925	4.1246	0.0885161
	2.73025	3.7946	0.0757303
	2.75125	4.4693	0.101871
	2.77225	3.2976	0.0564742
	2.79326	3.2204	0.0534831
	2.81426	4.0215	0.0845215
	2.83527	4.0519	0.0856993
	2.85627	3.7593	0.0743627
	2.87727	4.3684	0.097962
	2.89827	4.6015	0.106993
	2.91927	3.4266	0.0614723
	2.94028	3.0101	0.0453351
	2.96128	3.549	0.0662146
	2.98228	3.2172	0.0533592
	3.00328	3.0796	0.0480279
	3.02428	2.6349	0.0307981
	3.04528	2.4496	0.0236188
	3.06628	3.7047	0.0722472
	3.08728	2.2111	0.0143781
	3.10828	2.3301	0.0189888
	3.1293	2.4471	0.0235219
	3.1503	2.7757	0.0362534
	3.1713	1.8492	0.000356451
	3.1923	2.4044	0.0218675
	3.2133	3.3421	0.0581984
		1.8492
		27.6592
